# Supplementary material for: Ligand slope, density and affinity direct cell polarity and migration on molecular gradient surfaces
Source: Royal Society of Chemistry journal article supplement (doi:10.1039/c4ra03795b), 2014-01-01

*Ligand Slope, Density and Affinity Direct Cell Polarity and Migration on Molecular Gradient Surfaces*

*Eun-ju Lee,<sup>a</sup> Eugene W.L. Chan,<sup>a</sup> Wei Luo<sup>a,b</sup> and Muhammad N. Yousaf<sup>\*a,b</sup>*

*<sup>a</sup>Department of Chemistry and The Carolina Center for Genome Science*

*University of North Carolina at Chapel Hill, North Carolina, USA*

*<sup>b</sup> Department of Chemistry and Biology, Centre for Research in Biomolecular Interaction, Toronto, Canada.*

Email: chrchem@yorku.ca

**Supplementary Data:**

**Supplementary Figure 1.** A fluorescent image of patterned cells aligned with the density profile of the corresponding underlying peptide gradient. (A) Gradient mask generated from powerpoint. (B) Optical micrograph of the microfiche gradient pattern. (C) Fluorescent micrograph of Rhodamine immobilized to a 1% NVOC, 99% tetra-ethylene(glycol)alkanethiol surface after photodeprotection, electroactivation and immobilization of the dye. (D) Micrograph of cells stained after adhering and migrating on the gradient surfaces. Cells initially adhere to the high density regions and then migrate down the gradient to their final position (after 48 hours). (E) Cells attach, migrate and position themselves according to the slope and density of the peptide gradient. The final cell position permits the determination of the minimum ligand density required for adhesion on a given slope.

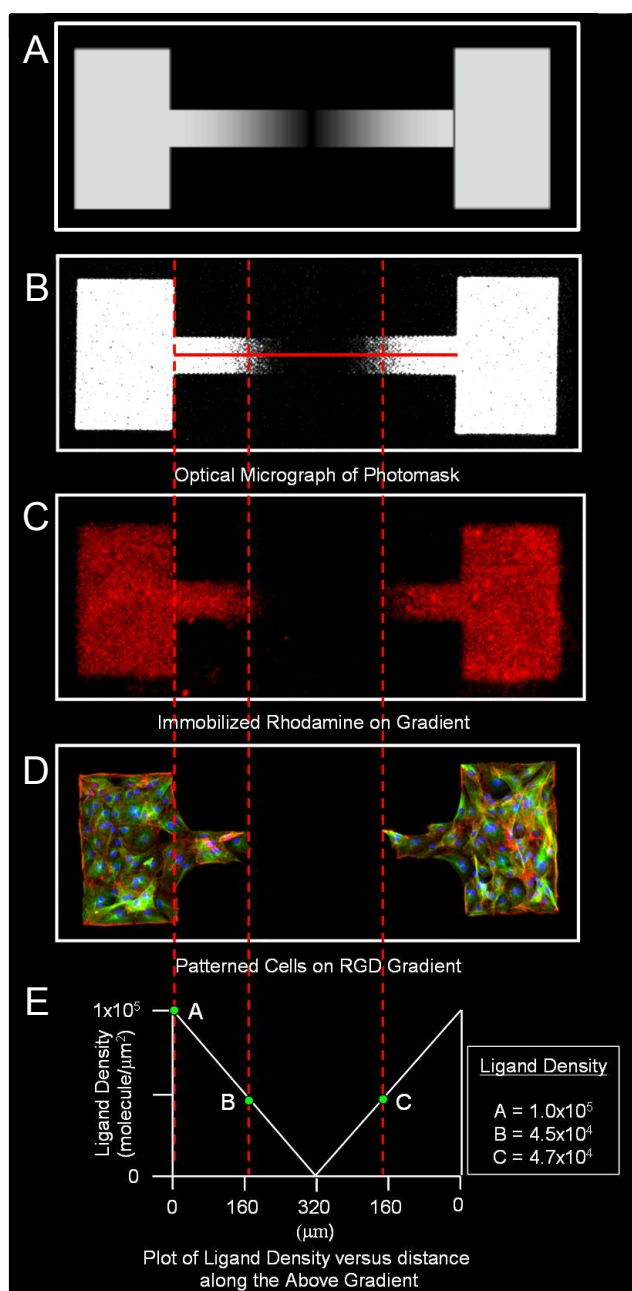

Supplement: c4ra03795b1.pdf [file c4ra03795b1.pdf]
